# Supplementary material for: Yin and Yang of Histone H2B Roles in Silencing and Longevity: A Tale of Two Arginines
Source: Oxford University Press journal article supplement (doi:10.1534/genetics.110.118489), 2010-08-17
Supplement: tables1.xls [file tables1.xls]

## Sheet: R95 vs WT
R95A VS WT
probesetID	raw Pvalue	FDR	foldchange	Alignments	Gene.Title	Gene.Symbol	Chromosomal.Location	R95A.1a	R95A.2a	R95A.3a	WT.1a	WT.2a	WT.3a		LEFT END	RIGHT END	LEFT TELO	RIGHT TELO	LEFT END To LEFT TELO	RIGHT END to RIGHT TELO	CLOSEST
1770532_at	8.93863e-07	0.00516206	-3.32517	chr12:732541-733876 (+) // 100.0 //	Methionine and cysteine synthase (O-acetyl homoserine-O-acetyl serine sulfhydrylase), required for sulfur amino acid synthesis	MET17	chr12	90.8288	108.091	98.2696	313.207	355.682	318.405		732541	733876	12085	1064279	720456	330403	330403
1776865_at	1.95988e-05	0.00896467	-3.1216	chr11:304754-305525 (+) // 100.0 //	Putative protein of unknown function; green fluorescent protein (GFP)-fusion protein localizes to the cytoplasm	---	chr11	877.518	825.871	906.018	3298.16	2644.9	2289.59		304754	305525	808	665542	303946	360017	303946
1779931_at	0.000224516	0.0364527	-2.18649	chr4:376752-378441 (-) // 100.0 //	Conserved NAD+ dependent histone deacetylase of the Sirtuin family involved in regulation of lifespan; plays roles in silencing at HML, HMR, telomeres, and the rDNA locus; negatively regulates initiation of DNA replication	SIR2	chr4	298.321	321.195	325.879	651.571	585.09	856.188		376752	378441	904	1524611	375848	1146170	375848
1772608_at	0.000559976	0.0659972	-1.75167	chr16:182653-183055 (-) // 100.0 //	Pheromone-regulated protein required for karyogamy; localizes to the inner membrane of the nuclear envelope	PRM3	chr16	825.937	768.559	815.785	1230.45	1337.52	1691.19		182653	183055	7223	942392	175430	759337	175430
1771262_at	1.352e-05	0.00816469	-1.74685	chr4:375675-376476 (-) // 100.0 //	Subunit of the SF3a splicing factor complex, required for spliceosome assembly	PRP11	chr4	232.028	230.345	235.484	409.95	375.578	435.73		375675	376476	904	1524611	374771	1148135	374771
1774858_at	0.00127418	0.0968211	-1.54994	chr6:199861-201697 (+) // 100.0 //	Poly(A) binding protein, suppressor of DNA polymerase epsilon mutation, similar to Mip6p	PES4	chr6	29.1381	31.4804	27.1692	44.3686	40.0104	52.2728		199861	201697	5530	269718	194331	68021	68021
1777232_at	0.00126433	0.0968211	-1.50213	chr4:1102175-1103420 (+) // 100.0 //	Protein of unknown function involved in DNA repair	HIM1	chr4	95.656	89.762	95.5221	138.449	123.704	162.316		1102175	1103420	904	1524611	1101271	421191	421191
1777364_s_at	2.42897e-05	0.0100195	-1.48938	chr7:707610-712031 (+) // 97.44 // /// chr9:205631-210129 (+) // 100.0 //	Retrotransposon TYA Gag and TYB Pol genes; transcribed/translated as one unit; polyprotein is processed to make a nucleocapsid-like protein (Gag), reverse transcriptase (RT), protease (PR), and integrase (IN); similar to retroviral genes /// TyB Gag-Pol protein; proteolytically processed to make the Gag, RT, PR, and IN proteins that are required for retrotransposition	---	chr7 /// chr9	3152.04	2929.37	3175.08	4616.72	4699.77	4464		707610	712031	781	1083642	706829	371611	371611
1769913_s_at	4.56196e-05	0.0128834	-1.46485	chr14:14831-15854 (+) // 97.75 // /// chr6:12928-13951 (+) // 98.14 // /// chr4:16203-17226 (+) // 100.0 // /// chr10:728268-729291 (-) // 98.34 //	Protein involved in synthesis of the thiamine precursor hydroxymethylpyrimidine (HMP); member of a subtelomeric gene family including THI5, THI11, THI12, and THI13	THI11 /// THI12 /// THI13 /// THI5	chr10 /// chr14 /// chr4 /// chr6	225.489	207.34	227.204	331.731	321.36	313.201		14831	15854	7428	783278	7403	767424	7403
1777394_at	0.000160562	0.0299655	-1.46035	chr12:52085-52589 (-) // 100.0 //	E2-like conjugating enzyme that mediates formation of the Atg12p-Atg5p conjugate, which is a critical step in autophagy	ATG10	chr12	244.42	263.277	278.671	375.129	369.125	403.333		52085	52589	12085	1064279	40000	1011690	40000
1772358_at	0.000811845	0.0781401	-1.45947	chr11:305851-306361 (+) // 100.0 //	Putative protein of unknown function; the authentic, non-tagged protein is detected in highly purified mitochondria in high-throughput studies	---	chr11	129.204	129.993	138.739	214.479	172.042	196.319		305851	306361	808	665542	305043	359181	305043
1777137_at	3.05257e-05	0.0103698	-1.45362	chr7:707610-712255 (+) // 100.0 // /// chr9:205631-210353 (+) // 99.16 //	Retrotransposon TYA Gag and TYB Pol genes; transcribed/translated as one unit; polyprotein is processed to make a nucleocapsid-like protein (Gag), reverse transcriptase (RT), protease (PR), and integrase (IN); similar to retroviral genes /// TyB Gag-Pol protein; proteolytically processed to make the Gag, RT, PR, and IN proteins that are required for retrotransposition	---	chr7 /// chr9	1479.42	1375.2	1442.81	2093.52	2009.49	2143.17		707610	712255	781	1083642	706829	371387	371387
1769515_at	0.000522306	0.0641769	-1.41886	chr6:110640-111087 (+) // 100.0 //	Putative protein of unknown function; transcribed during sporulation; null mutant exhibits increased resistance to rapamycin	---	chr6	18.368	19.7992	20.0263	25.9654	26.429	30.3148		110640	111087	5530	269718	105110	158631	105110
1770891_at	2.83248e-05	0.0102235	-1.35268	chr12:494495-495260 (-) // 100.0 //	Pseudouridine synthase, catalyzes only the formation of pseudouridine (Psi)-2819 in mitochondrial 21S rRNA; not essential for viability	PUS5	chr12	446.521	431.637	449.241	589.537	598.99	606.871		494495	495260	12085	1064279	482410	569019	482410
1778984_at	0.000466906	0.0599196	-1.34373	chr7:27920-31636 (-) // 100.0 //	Meiosis specific DNA helicase involved in the conversion of double-stranded breaks to later recombination intermediates and in crossover control; catalyzes the unwinding of Holliday junctions; has ssDNA and dsDNA stimulated ATPase activity	HFM1	chr7	97.5423	92.6287	105.581	133.65	127.047	136.308		27920	31636	781	1083642	27139	1052006	27139
1771533_at	0.000203945	0.0356903	-1.31326	chr1:186829-187726 (+) // 100.0 //	Pheromone-regulated protein with 3 predicted transmembrane segments and an FF sequence, a motif involved in COPII binding; member of DUP240 gene family	PRM9	chr1	391.234	369.937	408.02	510.059	519.986	504.3		186829	187726	801	229402	186028	41676	41676
1778518_at	0.000768221	0.0778329	-1.28991	chr14:609681-611661 (+) // 100.0 //	Meiosis-specific protein with similarity to phospholipase B, required for meiotic spindle pole body duplication and separation; required for spore formation	SPO1	chr14	64.2972	66.4411	61.7426	77.7245	87.3804	83.3531		609681	611661	7428	783278	602253	171617	171617
1777464_at	0.00119342	0.0931349	-1.27891	chr7:63770-64214 (-) // 100.0 //	Putative protein of unknown function; non-essential gene	---	chr7	73.0375	71.7759	71.0375	100.065	89.1612	87.312		63770	64214	781	1083642	62989	1019428	62989
1779235_at	0.00111576	0.0882676	-1.25956	chr5:274564-276151 (+) // 100.0 //	Putative purine-cytosine permease, very similar to Fcy2p but cannot substitute for its function	FCY21	chr5	284.519	292.657	260.909	343.514	347.845	363.316		274564	276151	6473	569594	268091	293443	268091
1777566_s_at	0.000343895	0.0496498	-1.22259	chr12:486201-487290 (-) // 100.0 // /// chr12:482549-483638 (-) // 100.0 // /// chr12:472969-474058 (-) // 100.0 // /// chr12:469317-470406 (-) // 100.0 //	Cell-wall L-asparaginase II, involved in asparagine catabolism; expression is induced during nitrogen starvation; four copies of ASP3 are present in the genome reference strain S288C	ASP3-1 /// ASP3-2 /// ASP3-3 /// ASP3-4	chr12	2483.13	2369.55	2407.29	2954.31	2904.28	3016.78		486201	487290	12085	1064279	474116	576989	474116
1773588_at	0.00105947	0.0874074	-1.22126	chr12:157932-159504 (-) // 100.0 //	Putative plasma membrane permease proposed to be involved in carboxylic acid uptake and repressed by thiamine; substrate of Dbf2p/Mob1p kinase; transcription is altered if mitochondrial dysfunction occurs	THI73	chr12	114.464	114.749	119.023	141.357	135.5	148.67		157932	159504	12085	1064279	145847	904775	145847
1775276_at	0.000998953	0.0874074	-1.2196	chr12:445524-447576 (-) // 100.0 //	Acetyl-coA synthetase isoform which, along with Acs1p, is the nuclear source of acetyl-coA for histone acetylation; mutants affect global transcription; required for growth on glucose; expressed under anaerobic conditions	ACS2	chr12	5337.04	5093.64	5460.94	6426.39	6699.54	6255.1		445524	447576	12085	1064279	433439	616703	433439
1770674_at	0.0010624	0.0874074	-1.20487	chr4:373962-375285 (-) // 100.0 //	Mitochondrial matrix protein that interacts with an N-terminal region of mitochondrial RNA polymerase (Rpo41p) and couples RNA processing and translation to transcription	MTF2	chr4	284.818	285.105	270.037	348.35	336.871	326.841		373962	375285	904	1524611	373058	1149326	373058
1775035_at	0.000321193	0.0488129	-1.20203	chr5:108503-110552 (-) // 100.0 //	Putative protein of unknown function; expression is increased greatly during sporulation; YEL023C is not an essential gene	---	chr5	317.531	309.176	308.616	371.203	376.32	376.697		108503	110552	6473	569594	102030	459042	102030
1772134_at	0.000801216	0.0781401	-1.20073	chr11:113215-114628 (-) // 100.0 //	Receptor for a factor receptor, transcribed in alpha cells and required for mating by alpha cells, couples to MAP kinase cascade to mediate pheromone response; ligand bound receptors are endocytosed and recycled to the plasma membrane; GPCR	STE3	chr11	3896.28	4153.12	4001.7	4739.28	4920.73	4806.91		113215	114628	808	665542	112407	550914	112407
1777670_at	0.000620116	0.06957	-1.19741	chr2:426145-426445 (-) // 100.0 //	High-mobility group non-histone chromatin protein, functionally redundant with Nhp6Ap; homologous to mammalian high mobility group proteins 1 and 2; acts to recruit transcription factor Rcs1p to certain promoters	NHP6B	chr2	1489.22	1485.66	1442.76	1714.85	1799.83	1775.6		426145	426445	6608	812373	419537	385928	385928
1773284_at	0.00109262	0.0876372	-1.18231	chr10:442601-444554 (-) // 100.0 //	Alpha-agglutinin of alpha-cells, binds to Aga1p during agglutination, N-terminal half is homologous to the immunoglobulin superfamily and contains binding site for a-agglutinin, C-terminal half is highly glycosylated and contains GPI anchor	SAG1	chr10	7774.35	7718.79	8198.55	9254.66	9316.61	9430.4		442601	444554	7767	744893	434834	300339	300339
1780046_at	0.00104195	0.0874074	-1.17151	chr2:556502-558152 (+) // 100.0 //	Protein required for daughter cell separation, multiple mitotic checkpoints, and chromosome stability; contains 12 degenerate leucine-rich repeat motifs; expression is induced by the Mitotic Exit Network (MEN)	AMN1	chr2	2054.39	2119.35	2148.54	2460.04	2437.89	2507.89		556502	558152	6608	812373	549894	254221	254221
1772738_at	0.00107462	0.0874074	1.1723	chr8:454226-455523 (+) // 99.85 //	Flavin-containing monooxygenase, localized to the cytoplasmic face of the ER membrane; catalyzes oxidation of biological thiols to maintain the ER redox buffer ratio for correct folding of disulfide-bonded proteins	FMO1	chr8	358.186	342.037	357.674	297.254	303.506	301.484		454226	455523	5504	556105	448722	100582	100582
1771088_at	0.000666733	0.0713034	1.17411	chr10:615269-615980 (+) // 100.0 //	Ubiquitin C-terminal hydrolase that cleaves ubiquitin-protein fusions to generate monomeric ubiquitin; hydrolyzes the peptide bond at the C-terminus of ubiquitin; also the major processing enzyme for the ubiquitin-like protein Rub1p	YUH1	chr10	1322.08	1321.34	1331.39	1149.34	1126.03	1110.33		615269	615980	7767	744893	607502	128913	128913
1770536_at	0.000879461	0.0806172	1.17513	chr7:495454-496504 (-) // 100.0 //	C-3 sterol dehydrogenase, catalyzes the second of three steps required to remove two C-4 methyl groups from an intermediate in ergosterol biosynthesis	ERG26	chr7	2708.34	2800.67	2779.7	2353.2	2393.75	2306.57		495454	496504	781	1083642	494673	587138	494673
1779836_at	0.000410751	0.0541134	1.19703	chr7:610564-611494 (+) // 100.0 //	C-4 methyl sterol oxidase, catalyzes the first of three steps required to remove two C-4 methyl groups from an intermediate in ergosterol biosynthesis; mutants accumulate the sterol intermediate 4,4-dimethylzymosterol	ERG25	chr7	9228.53	9097.7	9102.37	7635.17	7491.28	7789.78		610564	611494	781	1083642	609783	472148	472148
1774122_at	0.000508397	0.0638259	1.20098	chr16:17947-19079 (+) // 99.73 // /// chr15:1071786-1072917 (-) // 100.0 //	NAD(+)-dependent formate dehydrogenase, may protect cells from exogenous formate /// NAD(+)-dependent formate dehydrogenase, may protect cells from exogenous formate; YPL275W and YPL276W comprise a continuous open reading frame in some S. cerevisiae strains but not in the genomic reference strain S288C	FDH1 /// FDH2	chr15 /// chr16	149.823	155.966	154.708	130.371	125.666	127.385		17947	19079	7223	942392	10724	923313	10724
1778804_at	0.000535718	0.0644536	1.22097	chr5:175246-176011 (+) // 100.0 //	Cell wall mannoprotein of the Srp1p/Tip1p family of serine-alanine-rich proteins; expression is downregulated at acidic pH and induced by cold shock and anaerobiosis; abundance is increased in cells cultured without shaking	TIR1	chr5	10703.9	10764.9	11100.4	8580.27	8941.03	9159.83		175246	176011	6473	569594	168773	393583	168773
1779441_at	0.000638478	0.06957	1.23959	chr10:291031-293677 (-) // 100.0 //	Protein of unknown function, has similarity to Pry1p and Pry2p and to the plant PR-1 class of pathogen related proteins	PRY3	chr10	461.603	430.93	464.768	374.228	355.721	364.613		291031	293677	7767	744893	283264	451216	283264
1771627_at	0.000787687	0.0781401	1.24247	chr14:8329-9475 (+) // 90.66 // /// chr7:1081587-1082733 (-) // 100.0 //	Protein of unknown function, member of the DUP380 subfamily of conserved, often subtelomerically-encoded proteins	COS6	chr7	1682.77	1731.23	1683.34	1393.86	1421.81	1290.15		8329	9475	7428	783278	901	773803	901
1775486_s_at	0.000832517	0.0788161	1.24829	chr13:7243-8383 (+) // 100.0 // /// chr6:6425-7551 (+) // 95.0 // /// chr14:8329-9461 (+) // 94.65 // /// chr2:810291-811431 (-) // 100.0 //	Protein of unknown function, member of the DUP380 subfamily of conserved, often subtelomerically-encoded proteins /// Protein involved in salt resistance; interacts with sodium:hydrogen antiporter Nha1p; member of the DUP380 subfamily of conserved, often subtelomerically-encoded proteins	COS2 /// COS3	chr13 /// chr2	9263.61	9529.96	9466.95	7292.96	8040.67	7327.23		7243	8383	6344	923539	899	915156	899
1775916_at	0.00097026	0.0862039	1.2483	chr14:274363-276040 (+) // 100.0 //	Putative protein of unknown function; exhibits a two-hybrid interaction with Yhr151cp in a large-scale analysis	---	chr14	847.735	850.924	840.942	668.866	723.909	644.077		274363	276040	7428	783278	266935	507238	266935
1779201_at	0.000341854	0.0496498	1.25964	chr5:237568-238015 (-) // 100.0 //	Endoplasmic reticulum membrane protein, may facilitate protein-protein interactions between the Erg26p dehydrogenase and the Erg27p 3-ketoreductase and/or tether these enzymes to the ER, also interacts with Erg6p	ERG28	chr5	3272.47	3528.88	3288.54	2694.41	2625.35	2686.16		237568	238015	6473	569594	231095	331579	231095
1779503_s_at	0.000175434	0.0316604	1.28689	chr13:7243-8369 (+) // 95.09 // /// chr14:8329-9475 (+) // 95.35 // /// chr6:6425-7565 (+) // 100.0 // /// chr2:810305-811431 (-) // 95.0 //	Protein of unknown function, member of the DUP380 subfamily of conserved, often subtelomerically-encoded proteins	COS1 /// COS4 /// COS6	chr14 /// chr6 /// chr7	7362.92	7606.77	7203.28	5823.33	5542.54	5865.06		7243	8369	6344	923539	899	915170	899
1771569_at	0.000133094	0.0284673	1.30999	chr4:1323441-1324227 (-) // 100.0 //	Putative alpha/beta-serine hydrolase belonging to the subfamily of hormone-sensitive lipase-like hydrolases	---	chr4	1027.2	1017.59	1053.08	757.871	788.161	819.74		1323441	1324227	904	1524611	1322537	200384	200384
1777286_s_at	4.65418e-05	0.0128834	1.31235	chr1:225450-226854 (+) // 100.0 // /// chr8:552094-553498 (+) // 99.72 //	One of three repressible acid phosphatases, a glycoprotein that is transported to the cell surface by the secretory pathway; induced by phosphate starvation and coordinately regulated by PHO4 and PHO2 /// One of three repressible acid phosphatases, a glycoprotein that is transported to the cell surface by the secretory pathway; nearly identical to Pho11p; upregulated by phosphate starvation	PHO11 /// PHO12	chr1 /// chr8	719.258	695.947	699.688	532.707	547.034	531.754		225450	226854	801	229402	224649	2548	2548
1778479_at	7.3408e-05	0.0176638	1.31642	chr3:15797-16880 (-) // 100.0 //	Catabolic L-serine (L-threonine) deaminase, catalyzes the degradation of both L-serine and L-threonine; required to use serine or threonine as the sole nitrogen source, transcriptionally induced by serine and threonine	CHA1	chr3	309.851	306.075	304.421	226.683	231.013	241.668		15797	16880	1098	315780	14699	298900	14699
1776583_at	2.01802e-05	0.00896467	1.3421	chr15:1059524-1059986 (+) // 100.0 //	Mannoprotein that is incorporated into the cell wall via a glycosylphosphatidylinositol (GPI) anchor, involved in the retention of siderophore-iron in the cell wall	FIT2	chr15	4278.63	4222.54	4191.03	3123.08	3179.63	3154.18		1059524	1059986	847	1083920	1058677	23934	23934
1772681_s_at	0.000220667	0.0364527	1.35183	chr13:922519-923014 (+) // 97.78 // /// chr15:1082711-1083206 (+) // 100.0 // /// chr9:433811-434299 (+) // 93.74 // /// chr3:307690-308168 (+) // 90.1 // /// chr11:1822-2295 (-) // 90.91 // /// chr16:7932-8427 (-) // 100.0 //	Hypothetical protein	---	chr15 /// chr16	86.6495	90.1177	97.7041	66.6288	67.5375	68.6304		922519	923014	6344	923539	916175	525	525
1770947_at	9.64927e-06	0.00796065	1.40213	chr16:567263-568991 (-) // 100.0 //	2-methylisocitrate lyase of the mitochondrial matrix, functions in the methylcitrate cycle to catalyze the conversion of 2-methylisocitrate to succinate and pyruvate; ICL2 transcription is repressed by glucose and induced by ethanol	ICL2	chr16	679.73	690.586	694.166	496.476	490.41	485.506		567263	568991	7223	942392	560040	373401	373401
1778847_at	0.000595107	0.0687348	1.40657	chr10:722509-723595 (+) // 100.0 //	Endo-polygalacturonase, pectolytic enzyme that hydrolyzes the alpha-1,4-glycosidic bonds in the rhamnogalacturonan chains in pectins	PGU1	chr10	127.782	144.204	128.783	102.229	89.1937	93.5224		722509	723595	7767	744893	714742	21298	21298
1771323_at	0.000160854	0.0299655	1.41362	chr1:176652-177021 (-) // 96.21 // /// chr6:99224-99593 (-) // 100.0 //	Part of 23-member seripauperin multigene family encoded mainly in subtelomeric regions, active during alcoholic fermentation, regulated by anaerobiosis, negatively regulated by oxygen, repressed by heme	PAU5	chr6	406.871	397.763	440.704	307.9	292.371	280.467		176652	177021	801	229402	175851	52381	52381
1776828_at	0.00038865	0.0534394	1.47655	chr9:23118-26106 (-) // 100.0 //	Putative protein of unknown function; serine/threonine rich and highly similar to YOL155C, a putative glucan alpha-1,4-glucosidase; transcript is induced in both high and low pH environments; YIL169C is a non-essential gene	---	chr9	105.578	111.062	105.053	77.6747	76.0014	64.8183		23118	26106	7784	439065	15334	412959	15334
1772057_s_at	0.000635389	0.06957	1.51211	chr4:1801-2953 (+) // 100.0 // /// chr10:742542-743694 (-) // 95.4 //	Protein of unknown function, member of the DUP380 subfamily of conserved, often subtelomerically-encoded proteins; the authentic, non-tagged protein is detected in highly purified mitochondria in high-throughput studies /// Protein of unknown function, member the DUP380 subfamily of conserved, often subtelomerically-encoded proteins	COS5 /// COS7	chr10 /// chr4	2899.34	2973.12	3062.48	2045.77	2169.83	1720.08		1801	2953	904	1524611	897	1521658	897
1771091_at	0.000227237	0.0364527	1.51559	chr10:708505-709402 (-) // 100.0 //	Cell wall mannoprotein with similarity to Tir1p, Tir2p, Tir3p, and Tir4p; expressed under anaerobic conditions, completely repressed during aerobic growth	DAN1	chr10	8794.38	9412.04	9352.7	5632.12	5878.1	6716.91		708505	709402	7767	744893	700738	35491	35491
1779965_at	0.00101413	0.0874074	1.52224	chr8:385510-386488 (+) // 100.0 //	Daughter cell-specific secreted protein with similarity to glucanases, degrades cell wall from the daughter side causing daughter to separate from mother; expression is repressed by cAMP	DSE2	chr8	181.101	171.248	152.204	113.876	120.275	97.7041		385510	386488	5504	556105	380006	169617	169617
1776931_x_at	0.00025561	0.0398959	1.59968	chr4:1523229-1523592 (+) // 96.69 // /// chr14:781912-782275 (+) // 100.0 // /// chr2:809008-809371 (+) // 95.32 // /// chr7:1080309-1080672 (+) // 95.87 // /// chr12:1062914-1063277 (+) // 97.25 // /// chr5:63727-64090 (+) // 94.49 // /// chr15:11547-11910 (-) // 97.52 // /// chr8:11920-12283 (-) // 96.42 // /// chr1:1806-2169 (-) // 96.14 // /// chr10:8775-9138 (-) // 97.25 // /// chr2:7604-796…	Hypothetical protein /// Part of 23-member seripauperin multigene family encoded mainly in subtelomeric regions, active during alcoholic fermentation, regulated by anaerobiosis, negatively regulated by oxygen, repressed by heme	PAU6	chr12 /// chr14	1797.29	2110.11	1967.07	1115.82	1232.47	1325.16		1523229	1523592	904	1524611	1522325	1019	1019
1779129_at	0.000864238	0.0804996	1.6162	chr10:134029-135631 (-) // 100.0 //	Inositol 1-phosphate synthase, involved in synthesis of inositol phosphates and inositol-containing phospholipids; transcription is coregulated with other phospholipid biosynthetic genes by Ino2p and Ino4p, which bind the UASINO DNA element	INO1	chr10	442.42	591.286	518.891	314.179	302.167	338.69		134029	135631	7767	744893	126262	609262	126262
1772062_s_at	0.000128788	0.0284673	1.65267	chr14:11451-12129 (+) // 99.85 // /// chr6:9544-10222 (+) // 100.0 //	Protein whose expression is induced by DNA damage /// Hypothetical protein	---	chr14 /// chr6	262.358	287.447	273.767	185.49	152.599	161.586		11451	12129	7428	783278	4023	771149	4023
1775934_at	0.000739081	0.0768756	1.71792	chr14:7015-7214 (+) // 90.1 // /// chr15:440-634 (+) // 91.67 // /// chr4:498-888 (+) // 91.67 // /// chr13:5938-6328 (+) // 91.67 // /// chr2:6193-6394 (+) // 91.15 // /// chr16:942311-942766 (-) // 91.15 // /// chr9:439278-439478 (-) // 93.75 // /// chr14:783486-783683 (-) // 96.35 // /// chr3:315989-316181 (-) // 100.0 // /// chr4:1524819-1525018 (-) // 90.1 // /// chr2:812346-812736 (-) // 91…	Putative protein of unknown function; identified by fungal homology and RT-PCR	---	chr3	94.3093	86.5275	104.955	47.3048	62.6249	57.0228		7015	7214	7428	783278	-413	776064	-413
1779754_at	0.000927814	0.0837207	1.72376	chr6:107249-107579 (+) // 100.0 //	Plasma membrane localized protein that protects membranes from desiccation; induced by heat shock, oxidative stress, osmostress, stationary phase entry, glucose depletion, oleate and alcohol; regulated by the HOG and Ras-Pka pathways	HSP12	chr6	1854.3	2120.41	1901.21	1296.02	1198	939.999		107249	107579	5530	269718	101719	162139	101719
1774829_at	1.13228e-05	0.00816469	1.76054	chr9:333723-334533 (+) // 100.0 //	Cell wall mannoprotein of the Srp1p/Tip1p family of serine-alanine-rich proteins; expressed under anaerobic conditions and required for anaerobic growth	TIR3	chr9	4210.35	4540.7	4762.52	2606.54	2441.28	2622.16		333723	334533	7784	439065	325939	104532	104532
1776485_at	0.000359434	0.0506276	1.77737	chr8:6399-7545 (+) // 100.0 //	Nuclear membrane protein, member of the DUP380 subfamily of conserved, often subtelomerically-encoded proteins; regulation suggests a potential role in the unfolded protein response	COS8	chr8	722.01	664.704	708.552	330.558	413.532	443.054		6399	7545	5504	556105	895	548560	895
1770515_x_at	3.35044e-05	0.0107493	1.89546	chr12:1062914-1063277 (+) // 100.0 // /// chr5:63727-64090 (+) // 94.49 // /// chr14:781912-782275 (+) // 97.25 // /// chr4:1523229-1523592 (+) // 97.8 // /// chr7:1080309-1080672 (+) // 95.32 // /// chr2:809008-809371 (+) // 94.21 // /// chr12:13082-13445 (-) // 97.25 // /// chr9:8792-9155 (-) // 96.69 // /// chr1:1806-2169 (-) // 96.69 // /// chr10:8775-9138 (-) // 96.69 // /// chr15:11547-1191…	Part of 23-member seripauperin multigene family encoded mainly in subtelomeric regions, active during alcoholic fermentation, regulated by anaerobiosis, negatively regulated by oxygen, repressed by heme /// Hypothetical protein	PAU4	chr12 /// chr15	1084.28	1262.81	1239.81	582.522	635.8	673.068		1062914	1063277	12085	1064279	1050829	1002	1002
1777239_at	0.000158234	0.0299655	2.05385	chr7:9161-9395 (+) // 100.0 //	Putative protein of unknown function	---	chr7	52.3202	60.8373	45.345	23.3231	27.9467	25.5593		9161	9395	781	1083642	8380	1074247	8380
1780040_at	5.34136e-06	0.00645911	2.10594	chr3:293827-294314 (+) // 100.0 //	Silenced copy of a1 at HMR; homeobox corepressor that interacts with Alpha2p to repress haploid-specific gene transcription in diploid cells	HMRA1	chr3	17.2266	18.1491	17.6239	8.19839	7.80187	9.22338		293827	294314	1098	315780	292729	21466	21466
1776565_at	0.000412293	0.0541134	2.26464	chr7:754727-755252 (+) // 100.0 //	Protein of unknown function; expression induced in response to ketoconazole; promoter region contains a sterol regulatory element motif, which has been identified as a Upc2p-binding site	---	chr7	558.253	766.772	655.724	275.053	249.644	351.95		754727	755252	781	1083642	753946	328390	328390
1773670_at	5.11535e-05	0.013125	2.3018	chr15:344333-345797 (+) // 100.0 //	Cell wall mannoprotein of the Srp1p/Tip1p family of serine-alanine-rich proteins; expressed under anaerobic conditions and required for anaerobic growth; transcription is also induced by cold shock	TIR4	chr15	2992.71	3867.48	3808.72	1442.51	1500.25	1670.26		344333	345797	847	1083920	343486	738123	343486
1773641_x_at	5.22727e-05	0.013125	2.4359	chr12:1062914-1063277 (+) // 96.69 // /// chr2:809008-809371 (+) // 94.77 // /// chr4:1523229-1523592 (+) // 97.8 // /// chr5:63727-64090 (+) // 94.49 // /// chr14:781912-782275 (+) // 96.14 // /// chr7:1080309-1080672 (+) // 95.32 // /// chr1:1806-2169 (-) // 100.0 // /// chr12:13082-13445 (-) // 96.14 // /// chr2:7604-7968 (-) // 98.9 // /// chr9:8792-9155 (-) // 97.8 // /// chr10:8775-9138 (-)…	Hypothetical protein	---	chr1	815.319	1107.79	1040.32	385.475	434.555	388.087		1062914	1063277	12085	1064279	1050829	1002	1002
1769518_x_at	1.55518e-05	0.00816469	2.4377	chr14:781912-782275 (+) // 97.25 // /// chr4:1523229-1523592 (+) // 97.8 // /// chr7:1080309-1080672 (+) // 96.14 // /// chr12:1062914-1063277 (+) // 96.69 // /// chr2:809008-809371 (+) // 95.59 // /// chr5:63727-64090 (+) // 92.84 // /// chr1:1806-2169 (-) // 97.8 // /// chr10:8775-9138 (-) // 100.0 // /// chr15:11547-11910 (-) // 96.42 // /// chr7:6289-6652 (-) // 96.97 // /// chr8:11920-12283 …	Hypothetical protein /// Part of 23-member seripauperin multigene family encoded mainly in subtelomeric regions, active during alcoholic fermentation, regulated by anaerobiosis, negatively regulated by oxygen, repressed by heme	PAU1	chr10 /// chr9	1743.71	2220.57	2115.38	777.891	863.174	842.106		781912	782275	7428	783278	774484	1003	1003
1778969_x_at	1.50743e-05	0.00816469	2.45566	chr4:1523229-1523592 (+) // 95.59 // /// chr14:781912-782275 (+) // 94.49 // /// chr2:809008-809371 (+) // 95.32 // /// chr7:1080309-1080672 (+) // 96.42 // /// chr12:1062914-1063277 (+) // 94.49 // /// chr5:63727-64090 (+) // 100.0 // /// chr15:11547-11910 (-) // 92.56 // /// chr8:11920-12283 (-) // 95.32 // /// chr1:1806-2169 (-) // 94.49 // /// chr10:8775-9138 (-) // 94.77 // /// chr2:7604-796…	Part of 23-member seripauperin multigene family encoded mainly in subtelomeric regions, active during alcoholic fermentation, regulated by anaerobiosis, negatively regulated by oxygen, repressed by heme	PAU2	chr5	577.582	704.778	698.037	284.537	276.749	243.678		1523229	1523592	904	1524611	1522325	1019	1019
1770162_x_at	0.000149741	0.0299655	2.49189	chr4:1523229-1523592 (+) // 95.32 // /// chr14:781912-782275 (+) // 95.32 // /// chr2:809008-809371 (+) // 100.0 // /// chr7:1080309-1080672 (+) // 98.9 // /// chr12:1062914-1063277 (+) // 94.21 // /// chr5:63727-64090 (+) // 95.32 // /// chr15:11547-11910 (-) // 93.39 // /// chr8:11920-12283 (-) // 95.59 // /// chr1:1806-2169 (-) // 94.77 // /// chr10:8775-9138 (-) // 95.59 // /// chr2:7604-7968…	Cell wall mannoprotein with similarity to Tir1p, Tir2p, Tir3p, and Tir4p; expressed under anaerobic conditions, completely repressed during aerobic growth	DAN3	chr2	764.371	1138.88	969.661	343.148	388.975	408.704		1523229	1523592	904	1524611	1522325	1019	1019
1770140_x_at	5.42358e-06	0.00645911	2.62075	chr14:782146-782275 (+) // 95.35 // /// chr4:1523463-1523592 (+) // 99.22 // /// chr7:1080543-1080672 (+) // 100.0 // /// chr12:1063148-1063277 (+) // 96.12 // /// chr2:809242-809371 (+) // 97.67 // /// chr5:63961-64090 (+) // 99.22 // /// chr1:1806-1935 (-) // 98.45 // /// chr1:176652-176781 (-) // 90.7 // /// chr10:8775-8904 (-) // 97.67 // /// chr15:11547-11676 (-) // 93.02 // /// chr7:6289-64…	Hypothetical protein /// Hypothetical protein identified by homology. See FEBS Letters [2000] 487:31-36. /// Putative protein of unknown function; mRNA expression appears to be regulated by SUT1 and UPC2 /// Putative protein of unknown function; not an essential gene	---	chr1 /// chr2 /// chr4 /// chr7 /// chr8	2320.87	2860.55	2786.13	1021.55	1050.53	957.537		782146	782275	7428	783278	774718	1003	1003
1779438_at	0.000132921	0.0284673	2.7232	chr10:224751-226434 (+) // 100.0 //	Protein of unknown function, contains a SET domain	SET4	chr10	69.105	78.7735	77.648	26.6723	35.0473	22.3907		224751	226434	7767	744893	216984	518459	216984
1776208_at	4.68489e-05	0.0128834	2.99596	chr6:269047-269503 (+) // 100.0 //	Putative protein of unknown function	---	chr6	108.261	115.498	107.704	46.4649	30.7441	35.0578		269047	269503	5530	269718	263517	215	215
1778358_at	0.00074546	0.0768756	3.01364	chr15:781993-783298 (+) // 100.0 //	Protein implicated in the regulation of ergosterol biosynthesis; one of a seven member gene family with a common essential function and non-essential unique functions; similar to human oxysterol binding protein (OSBP)	HES1	chr15	366.053	480.447	441.61	121.525	112.309	207.909		781993	783298	847	1083920	781146	300622	300622
1778121_s_at	2.60681e-05	0.0100362	3.72494	chr9:433924-434299 (+) // 96.0 // /// chr15:1082831-1083206 (+) // 97.33 // /// chr3:307793-308168 (+) // 100.0 // /// chr13:922639-923014 (+) // 98.13 // /// chr16:7932-8307 (-) // 97.33 // /// chr11:1822-2182 (-) // 92.27 //	Part of 23-member seripauperin multigene family encoded mainly in subtelomeric regions, active during alcoholic fermentation, regulated by anaerobiosis, negatively regulated by oxygen, repressed by heme /// Hypothetical protein /// Putative protein of unknown function	PAU15 /// PAU3	chr11 /// chr13 /// chr15 /// chr16 /// chr3 /// chr9	708.357	1114.5	913.851	227.204	245.563	250.191		433924	434299	7784	439065	426140	4766	4766
1770751_at	5.5923e-06	0.00645911	3.73095	chr16:26610-28164 (-) // 100.0 //	Putative protein of unknown function; gene expression induced in response to ketoconazole; YPL272C is not an essential gene	---	chr16	361.234	499.128	439.837	109.758	124.108	112.099		26610	28164	7223	942392	19387	914228	19387
1769905_at	7.52772e-06	0.00724543	4.20674	chr10:711949-715435 (-) // 100.0 //	Cell wall mannoprotein with similarity to Tir1p, Tir2p, Tir3p, and Tir4p; expressed under anaerobic conditions, completely repressed during aerobic growth	DAN4	chr10	1394.25	1963.87	1897.78	428.17	432.542	376.893		711949	715435	7767	744893	704182	29458	29458
1777712_at	4.60118e-06	0.00645911	6.45824	chr1:228834-229308 (+) // 100.0 // /// chr12:1003653-1004123 (+) // 92.62 // /// chr8:555493-555963 (+) // 95.36 //	Non-functional protein with homology IMP dehydrogenase; YAR073W/IMD1 and YAR075W comprise a continuous reading frame in some strains of S. cerevisiae.	---	chr1	76.159	71.0955	54.8364	10.7393	8.54747	12.0081		228834	229308	801	229402	228033	94	94

## Sheet: R102 vs WT
R102A VS WT
probesetID	raw Pvalue	FDR	foldchange	Alignments	Gene.Title	Gene.Symbol	Chromosomal.Location	R102A.1a	R102A.2a	R102A.3a	WT.1a	WT.2a	WT.3a		LEFT END	RIGHT END	LEFT TELO	RIGHT TELO	LEFT to LEFT TELO	RIGHT to RIGHT TELO	CLOSEST
1771376_at	2.85839e-05	0.0292747	-2.08349	chr12:605757-607119 (-) // 100.0 //	Kynureninase, required for biosynthesis of nicotinic acid from tryptophan via kynurenine pathway	BNA5	chr12	484.25	392.814	485.004	952.272	975.981	897.784		605757	607119	12085	1064279	593672	457160	457160
1774858_at	0.000370633	0.0592749	-1.96189	chr6:199861-201697 (+) // 100.0 //	Poly(A) binding protein, suppressor of DNA polymerase epsilon mutation, similar to Mip6p	PES4	chr6	26.7763	20.7118	24.9036	44.2999	42.5021	55.3912		199861	201697	5530	269718	194331	68021	68021
1771104_at	0.000202877	0.0474376	-1.84514	chr9:222933-225951 (-) // 100.0 //	Meiosis-specific protein essential for chromosome synapsis, similar to phospholipase A2, involved in completion of nuclear divisions during meiosis; induced early in meiosis	SPO22	chr9	16.98	19.5409	21.5105	38.0763	37.1546	31.6921		222933	225951	7784	439065	215149	213114	213114
1772033_at	0.00035848	0.0591492	-1.8082	chr15:564475-566191 (-) // 100.0 //	Phosphoribosylaminoimidazole carboxylase, catalyzes a step in the 'de novo' purine nucleotide biosynthetic pathway; red pigment accumulates in mutant cells deprived of adenine	ADE2	chr15	4237.6	3500.46	4463.45	7332.77	8141.76	6556.44		564475	566191	847	1083920	563628	517729	517729
1775391_s_at	3.43164e-05	0.0292747	-1.69056	chr15:22523-24293 (-) // 98.59 // /// chr9:16783-18553 (-) // 100.0 // /// chr10:16766-18536 (-) // 100.0 //	Putative protein of unknown function with similarity to glucosidases; green fluorescent protein (GFP)-fusion protein localizes to the cytoplasm /// Protein of unknown function, expression is induced during nitrogen limitation /// Putative protein of unknown function	FSP2	chr10 /// chr15 /// chr9	57.3179	65.6836	67.0609	108.113	104.848	107.613		22523	24293	847	1083920	21676	1059627	21676
1777972_at	0.000946522	0.0854088	-1.60561	chr7:357377-358340 (+) // 100.0 //	Putative protein of unknown function; non-essential gene; interacts genetically with CHS5, a gene involved in chitin biosynthesis	---	chr7	157.26	153.226	145.217	279.958	250.639	206.418		357377	358340	781	1083642	356596	725302	356596
1777394_at	0.000403591	0.0597626	-1.53426	chr12:52085-52589 (-) // 100.0 //	E2-like conjugating enzyme that mediates formation of the Atg12p-Atg5p conjugate, which is a critical step in autophagy	ATG10	chr12	265.871	279.947	278.373	378.209	416.612	474.907		52085	52589	12085	1064279	40000	1011690	40000
1780044_at	5.52149e-05	0.0292747	-1.53402	chr9:238095-240705 (-) // 100.0 //	Ribonucleotide-diphosphate reductase (RNR), large subunit; the RNR complex catalyzes the rate-limiting step in dNTP synthesis and is regulated by DNA replication and DNA damage checkpoint pathways via localization of the small subunits	RNR3	chr9	1860.45	1655.83	1759.22	2565.53	2756.05	2766.8		238095	240705	7784	439065	230311	198360	198360
1771073_at	6.54016e-05	0.0292747	-1.52376	chr9:412032-412767 (-) // 100.0 //	Protein of unknown function, expression is sensitive to nitrogen catabolite repression and regulated by Dal80p; contains transmembrane domain	DCG1	chr9	182.724	162.289	177.601	253.323	269.271	273.161		412032	412767	7784	439065	404248	26298	26298
1778254_at	0.000334801	0.056867	-1.51839	chr5:45019-45721 (-) // 100.0 //	Protein of unknown function involved in telomere maintenance; target of UME6 regulation	---	chr5	122.052	121.908	134.78	191.28	210.247	174.563		45019	45721	6473	569594	38546	523873	38546
1771896_at	0.00066223	0.0752753	-1.51124	chr16:373787-375164 (+) // 100.0 //	Plasma membrane sulfite pump involved in sulfite metabolism and required for efficient sulfite efflux; major facilitator superfamily protein	SSU1	chr16	397.393	371.407	450.835	648.187	632.855	559.867		373787	375164	7223	942392	366564	567228	366564
1778479_at	3.92072e-05	0.0292747	-1.49032	chr3:15797-16880 (-) // 100.0 //	Catabolic L-serine (L-threonine) deaminase, catalyzes the degradation of both L-serine and L-threonine; required to use serine or threonine as the sole nitrogen source, transcriptionally induced by serine and threonine	CHA1	chr3	168.652	185.478	172.001	253.283	263.063	267.293		15797	16880	1098	315780	14699	298900	14699
1778984_at	4.78334e-05	0.0292747	-1.48781	chr7:27920-31636 (-) // 100.0 //	Meiosis specific DNA helicase involved in the conversion of double-stranded breaks to later recombination intermediates and in crossover control; catalyzes the unwinding of Holliday junctions; has ssDNA and dsDNA stimulated ATPase activity	HFM1	chr7	80.4468	77.5751	73.2802	115.551	109.932	118.565		27920	31636	781	1083642	27139	1052006	27139
1777286_s_at	3.30524e-05	0.0292747	-1.48403	chr1:225450-226854 (+) // 100.0 // /// chr8:552094-553498 (+) // 99.72 //	One of three repressible acid phosphatases, a glycoprotein that is transported to the cell surface by the secretory pathway; induced by phosphate starvation and coordinately regulated by PHO4 and PHO2 /// One of three repressible acid phosphatases, a glycoprotein that is transported to the cell surface by the secretory pathway; nearly identical to Pho11p; upregulated by phosphate starvation	PHO11 /// PHO12	chr1 /// chr8	390.287	371.157	411.751	585.881	575.176	578.491		225450	226854	801	229402	224649	2548	2548
1777222_at	0.000205358	0.0474376	-1.46402	chr2:537830-539660 (+) // 100.0 //	Protein expressed specifically in spores	YSW1	chr2	65.1829	66.1624	58.0139	96.0637	93.2798	87.6135		537830	539660	6608	812373	531222	272713	272713
1779914_at	0.000905583	0.0854088	-1.45678	chr8:13562-14270 (+) // 100.0 //	Putative integral membrane protein, member of DUP240 gene family; green fluorescent protein (GFP)-fusion protein localizes to the plasma membrane in a punctate pattern	---	chr8	85.1227	73.1135	68.5437	112.213	113.123	103.896		13562	14270	5504	556105	8058	541835	8058
1778518_at	8.03651e-05	0.0309406	-1.4548	chr14:609681-611661 (+) // 100.0 //	Meiosis-specific protein with similarity to phospholipase B, required for meiotic spindle pole body duplication and separation; required for spore formation	SPO1	chr14	60.53	55.3135	59.7295	81.1135	87.8859	86.3742		609681	611661	7428	783278	602253	171617	171617
1770343_s_at	8.74946e-05	0.0315801	-1.45432	chr14:13266-14163 (+) // 99.33 // /// chr6:11362-12259 (+) // 100.0 //	Member of a stationary phase-induced gene family; transcription of SNZ2 is induced prior to diauxic shift, and also in the absence of thiamin in a Thi2p-dependent manner; forms a coregulated gene pair with SNO3 /// Member of a stationary phase-induced gene family; transcription of SNZ2 is induced prior to diauxic shift, and also in the absence of thiamin in a Thi2p-dependent manner; forms a coreg…	SNZ2 /// SNZ3	chr14 /// chr6	484.211	441.981	478.84	715.455	664.946	662.583		13266	14163	7428	783278	5838	769115	5838
1775992_at	7.83038e-06	0.0150735	-1.45239	chr2:39136-40519 (+) // 100.0 //	Kynurenine 3-mono oxygenase, required for biosynthesis of nicotinic acid from tryptophan via kynurenine pathway	BNA4	chr2	725.94	716.822	726.447	1051.84	1047.93	1050.72		39136	40519	6608	812373	32528	771854	32528
1777886_at	6.96526e-05	0.0292747	-1.45209	chr14:553375-554746 (+) // 100.0 //	Putative protein of unknown function with strong similarity to alanyl-tRNA synthases from Eubacteria; green fluorescent protein (GFP)-fusion protein localizes to the cytoplasm; YNL040W is not an essential gene	---	chr14	1147.95	1159.66	1216.61	1747.05	1767.84	1605.61		553375	554746	7428	783278	545947	228532	228532
1769518_x_at	0.000278756	0.0536605	-1.43961	chr14:781912-782275 (+) // 97.25 // /// chr4:1523229-1523592 (+) // 97.8 // /// chr7:1080309-1080672 (+) // 96.14 // /// chr12:1062914-1063277 (+) // 96.69 // /// chr2:809008-809371 (+) // 95.59 // /// chr5:63727-64090 (+) // 92.84 // /// chr1:1806-2169 (-) // 97.8 // /// chr10:8775-9138 (-) // 100.0 // /// chr15:11547-11910 (-) // 96.42 // /// chr7:6289-6652 (-) // 96.97 // /// chr8:11920-12283 …	Hypothetical protein /// Part of 23-member seripauperin multigene family encoded mainly in subtelomeric regions, active during alcoholic fermentation, regulated by anaerobiosis, negatively regulated by oxygen, repressed by heme	PAU1	chr10 /// chr9	651.401	594.844	574.03	817.046	911.998	890.604		781912	782275	7428	783278	774484	1003	1003
1770437_at	0.000931384	0.0854088	-1.42895	chr16:590277-591021 (-) // 100.0 //	Putative protein of unknown function	---	chr16	137.073	119.68	115.28	183.338	184.29	163.313		590277	591021	7223	942392	583054	351371	351371
1769713_at	0.000494688	0.0664377	-1.42598	chr15:10117-10765 (+) // 100.0 //	Putative protein of unknown function; member of the Dal5p subfamily of the major facilitator family	---	chr15	165.484	147.652	137.896	213.613	207.429	220.491		10117	10765	847	1083920	9270	1073155	9270
1771853_at	0.000191991	0.0474376	-1.40241	chr7:418706-418889 (-) // 100.0 //	Putative protein of unknown function; identified by fungal homology and RT-PCR	---	chr7	49.5305	55.1157	52.9469	77.5035	71.4468	71.9962		418706	418889	781	1083642	417925	664753	417925
1776321_at	6.52147e-05	0.0292747	-1.39148	chr1:209305-209604 (+) // 94.85 // /// chr8:529911-530210 (+) // 93.81 // /// chr1:22396-22687 (-) // 100.0 //	Putative protein of unknown function; identified by expression profiling and mass spectrometry	---	chr1	70.304	67.1133	70.7355	92.6284	98.4764	98.5777		209305	209604	801	229402	208504	19798	19798
1777517_at	0.000192293	0.0474376	-1.38811	chr3:208126-209602 (-) // 100.0 //	Putative protein of unknown function	---	chr3	45.5201	45.0156	46.5314	66.6133	58.9468	64.9468		208126	209602	1098	315780	207028	106178	106178
1775649_at	4.77175e-05	0.0292747	-1.37946	chr5:538428-539163 (-) // 100.0 //	Hydroperoxide and superoxide-radical responsive glutathione-dependent oxidoreductase; monothiol glutaredoxin subfamily member along with Grx3p and Grx5p; protects cells from oxidative damage	GRX4	chr5	812.054	761.78	776.105	1095.96	1080.94	1063.81		538428	539163	6473	569594	531955	30431	30431
1770253_at	0.000181709	0.0474376	-1.36307	chr4:1512079-1513591 (+) // 100.0 //	Putative protein of unknown function; green fluorescent protein (GFP)-fusion protein localizes to the cytoplasm; YDR539W is not an essential gene; homolog of E. coli UbiD	---	chr4	742.062	750.179	783.203	1018.56	990.312	1094.65		1512079	1513591	904	1524611	1511175	11020	11020
1771533_at	0.000196614	0.0474376	-1.3581	chr1:186829-187726 (+) // 100.0 //	Pheromone-regulated protein with 3 predicted transmembrane segments and an FF sequence, a motif involved in COPII binding; member of DUP240 gene family	PRM9	chr1	408.072	403.182	423.051	552.057	592.404	533.113		186829	187726	801	229402	186028	41676	41676
1778453_s_at	0.000265485	0.0528681	-1.34868	chr14:12207-12876 (-) // 99.7 // /// chr6:10300-10969 (-) // 100.0 //	Protein of unknown function, nearly identical to Sno2p; expression is induced before the diauxic shift and also in the absence of thiamin /// Protein of unknown function, nearly identical to Sno3p; expression is induced before the diauxic shift and also in the absence of thiamin	SNO2 /// SNO3	chr14 /// chr6	363.536	325.612	342.613	464.375	449.212	476.932		12207	12876	7428	783278	4779	770402	4779
1770140_x_at	0.000675612	0.0752753	-1.34711	chr14:782146-782275 (+) // 95.35 // /// chr4:1523463-1523592 (+) // 99.22 // /// chr7:1080543-1080672 (+) // 100.0 // /// chr12:1063148-1063277 (+) // 96.12 // /// chr2:809242-809371 (+) // 97.67 // /// chr5:63961-64090 (+) // 99.22 // /// chr1:1806-1935 (-) // 98.45 // /// chr1:176652-176781 (-) // 90.7 // /// chr10:8775-8904 (-) // 97.67 // /// chr15:11547-11676 (-) // 93.02 // /// chr7:6289-64…	Hypothetical protein /// Hypothetical protein identified by homology. See FEBS Letters [2000] 487:31-36. /// Putative protein of unknown function; mRNA expression appears to be regulated by SUT1 and UPC2 /// Putative protein of unknown function; not an essential gene	---	chr1 /// chr2 /// chr4 /// chr7 /// chr8	851.538	735.623	805.518	1064.73	1115.61	1038.48		782146	782275	7428	783278	774718	1003	1003
1776312_at	0.00037977	0.0592749	-1.33577	chr6:134515-137152 (-) // 100.0 //	Protein involved in meiotic recombination, required for normal levels of crossing over, colocalizes with Zip2p to discrete foci on meiotic chromosomes, has homology to bacterial MutS protein	MSH4	chr6	66.2732	67.079	64.9468	92.4131	82.0158	90.7914		134515	137152	5530	269718	128985	132566	128985
1775486_s_at	0.000526749	0.0691358	-1.3351	chr13:7243-8383 (+) // 100.0 // /// chr6:6425-7551 (+) // 95.0 // /// chr14:8329-9461 (+) // 94.65 // /// chr2:810291-811431 (-) // 100.0 //	Protein of unknown function, member of the DUP380 subfamily of conserved, often subtelomerically-encoded proteins /// Protein involved in salt resistance; interacts with sodium:hydrogen antiporter Nha1p; member of the DUP380 subfamily of conserved, often subtelomerically-encoded proteins	COS2 /// COS3	chr13 /// chr2	6401.98	5802.57	6175.41	7888.68	8693.91	7960.11		7243	8383	6344	923539	899	915156	899
1771125_at	7.0969e-05	0.0292747	-1.33383	chr4:1510887-1511616 (+) // 100.0 //	Phenylacrylic acid decarboxylase, confers resistance to cinnamic acid, decarboxylates aromatic carboxylic acids to the corresponding vinyl derivatives; homolog of E. coli UbiX	PAD1	chr4	488.027	471.207	480.113	621.926	645.803	652.323		1510887	1511616	904	1524611	1509983	12995	12995
1779638_at	0.000454832	0.0643078	-1.32924	chr12:590561-592043 (-) // 100.0 //	Structural component of the meiotic outer plaque, which is a membrane-organizing center that assembles on the cytoplasmic face of the spindle pole body during meiosis II and triggers the formation of the prospore membrane	ADY4	chr12	265.014	265.418	281.195	351.422	343.78	384.511		590561	592043	12085	1064279	578476	472236	472236
1777143_s_at	0.000152712	0.0474376	-1.32857	chr10:735738-736812 (+) // 99.91 // /// chr4:8682-9756 (-) // 100.0 //	Protein of unknown function, computational analysis of large-scale protein-protein interaction data suggests a possible role in fructose or mannose metabolism /// Sorbitol dehydrogenase; expression is induced in the presence of sorbitol	SOR1 /// SOR2	chr10 /// chr4	388.781	390.046	373.631	491.086	509.791	530.721		735738	736812	7767	744893	727971	8081	8081
1769913_s_at	0.000243327	0.0510966	-1.29604	chr14:14831-15854 (+) // 97.75 // /// chr6:12928-13951 (+) // 98.14 // /// chr4:16203-17226 (+) // 100.0 // /// chr10:728268-729291 (-) // 98.34 //	Protein involved in synthesis of the thiamine precursor hydroxymethylpyrimidine (HMP); member of a subtelomeric gene family including THI5, THI11, THI12, and THI13	THI11 /// THI12 /// THI13 /// THI5	chr10 /// chr14 /// chr4 /// chr6	283.28	266.085	285.525	366.625	363.594	351.473		14831	15854	7428	783278	7403	767424	7403
1775688_at	0.000661182	0.0752753	-1.29384	chr4:130871-131834 (-) // 100.0 //	Putative protein of unknown function; YDL183C is not an essential gene	---	chr4	238.62	236.684	237.322	329.57	290.124	303.613		130871	131834	904	1524611	129967	1392777	129967
1779747_at	0.000477988	0.0657233	-1.28253	chr15:459480-461277 (-) // 100.0 //	Transporter of thiamine or related compound; shares sequence similarity to Thi7p; proposed to be involved in 5-fluorocytosine sensitivity	THI71	chr15	320.604	352.068	346.092	444.735	434.175	426.794		459480	461277	847	1083920	458633	622643	458633
1777196_at	0.00055256	0.0709118	-1.27605	chr11:630781-632431 (+) // 100.0 //	Phosphoenolpyruvate carboxykinase, key enzyme in gluconeogenesis, catalyzes early reaction in carbohydrate biosynthesis, glucose represses transcription and accelerates mRNA degradation, regulated by Mcm1p and Cat8p, located in the cytosol	PCK1	chr11	259.656	252.7	237.149	329	315.587	311.393		630781	632431	808	665542	629973	33111	33111
1778834_at	0.000623064	0.0752753	-1.26464	chr12:27408-28305 (-) // 100.0 //	Putative protein of unknown function, transcription is activated by paralogous transcription factors Yrm1p and Yrr1p along with genes involved in pleiotropic drug resistance (PDR) phenomenon; YLL056C is not an essential gene	---	chr12	703.705	646.066	703.298	845.475	874.011	875.161		27408	28305	12085	1064279	15323	1035974	15323
1779030_at	0.00082092	0.0817381	-1.24469	chr4:145826-147590 (-) // 100.0 //	D-lactate dehydrogenase, oxidizes D-lactate to pyruvate, transcription is heme-dependent, repressed by glucose, and derepressed in ethanol or lactate; located in the mitochondrial inner membrane	DLD1	chr4	1776.7	1758.59	1788.57	2271.16	2275.96	2084.76		145826	147590	904	1524611	144922	1377021	144922
1779809_at	0.000401929	0.0597626	-1.23779	chr5:548415-549512 (+) // 100.0 //	Meiosis-specific protein required for repair of double-strand breaks and pairing between homologous chromosomes; homolog of Rad51p and the bacterial RecA protein	DMC1	chr5	164.188	163.346	162.005	195.664	202.294	208.175		548415	549512	6473	569594	541942	20082	20082
1773565_at	0.000456558	0.0643078	-1.23444	chr15:54592-55102 (-) // 100.0 //	Lumazine synthase (6,7-dimethyl-8-ribityllumazine synthase, also known as DMRL synthase); catalyzes synthesis of immediate precursor to riboflavin	RIB4	chr15	3339.21	3297.12	3478.09	4130.36	4107.05	4246.28		54592	55102	847	1083920	53745	1028818	53745
1772066_at	0.000247741	0.0510966	-1.23057	chr8:15664-16117 (+) // 100.0 //	Putative protein of unknown function; member of the DUP380 subfamily of conserved, often subtelomerically-encoded proteins	---	chr8	138.759	137.447	140.181	169.843	171.931	170.612		15664	16117	5504	556105	10160	539988	10160
1771323_at	0.000808027	0.0817381	-1.22342	chr1:176652-177021 (-) // 96.21 // /// chr6:99224-99593 (-) // 100.0 //	Part of 23-member seripauperin multigene family encoded mainly in subtelomeric regions, active during alcoholic fermentation, regulated by anaerobiosis, negatively regulated by oxygen, repressed by heme	PAU5	chr6	250.542	263.529	264.976	327.532	311.957	313.541		176652	177021	801	229402	175851	52381	52381
1773423_at	0.000872922	0.0854088	-1.22152	chr15:678871-679261 (+) // 100.0 //	Protein of unknown function, required for survival upon exposure to K1 killer toxin	FYV12	chr15	44.8651	45.9825	48.5374	57.3081	56.7852	56.0824		678871	679261	847	1083920	678024	404659	404659
1770672_at	0.00062784	0.0752753	1.19766	chr5:404808-406383 (+) // 100.0 //	Palmitoylated, vacuolar membrane-localized casein kinase I isoform; negatively regulates vacuole fusion during hypertonic stress via phosphorylation of the HOPS complex subunit, Vps41p; shares overlapping essential functions with Hrr25p	YCK3	chr5	652.947	653.829	635.47	545.761	539.716	536.131		404808	406383	6473	569594	398335	163211	163211
1775137_s_at	0.00111035	0.097156	1.24946	chr15:1074206-1075729 (+) // 96.99 // /// chr16:15404-16868 (-) // 100.0 //	Putative protein of unknown function; expression regulated by copper levels /// Putative protein of unknown function; localized to the membranes; gene expression regulated by copper levels	---	chr15 /// chr16	441.051	413.947	433.891	353.239	324.731	354.045		1074206	1075729	847	1083920	1073359	8191	8191
1776725_at	0.000709037	0.0752753	1.27166	chr15:761613-762084 (-) // 100.0 //	Conserved protein of the mitochondrial matrix, required for synthesis of mitochondrial and cytosolic iron-sulfur proteins, performs a scaffolding function in mitochondria during Fe/S cluster assembly; isu1 isu2 double mutant is inviable	ISU2	chr15	1830.4	1764.57	1818.53	1489.81	1336.9	1434.04		761613	762084	847	1083920	760766	321836	321836
1774859_at	0.000177874	0.0474376	1.27787	chr5:339859-342163 (-) // 100.0 //	Cobalamin-independent methionine synthase, involved in amino acid biosynthesis; requires a minimum of two glutamates on the methyltetrahydrofolate substrate, similar to bacterial metE homologs	MET6	chr5	7765.85	7763.31	7954.59	6105.87	5970.17	6304.61		339859	342163	6473	569594	333386	227431	227431
1779908_at	0.000934948	0.0854088	1.27935	chr10:325937-327569 (-) // 100.0 //	Subunit of TORC2 (Tor2p-Lst8p-Avo1-Avo2-Tsc11p-Bit61p-Slm1p-Slm2p), a membrane-associated complex that regulates cell cycle-dependent actin cytoskeletal dynamics during polarized growth and cell wall integrity	BIT61	chr10	168.204	182.249	185.152	139.119	145.708	133.719		325937	327569	7767	744893	318170	417324	318170
1777421_at	0.000972871	0.0864359	1.28166	chr5:13719-14415 (+) // 100.0 //	Protein required for sporulation	RMD6	chr5	249.593	245.104	233.92	203.028	182.61	183.335		13719	14415	6473	569594	7246	555179	7246
1770576_at	0.000311217	0.0561649	1.28577	chr16:482838-485682 (+) // 100.0 //	Plasma membrane H+-ATPase, isoform of Pma1p, involved in pumping protons out of the cell; regulator of cytoplasmic pH and plasma membrane potential	PMA2	chr16	128.01	126.172	117.947	95.0258	96.336	97.898		482838	485682	7223	942392	475615	456710	456710
1773315_at	0.000782849	0.0807313	1.30064	chr6:14792-15431 (-) // 100.0 //	Putative aryl-alcohol dehydrogenase with similarity to P. chrysosporium aryl-alcohol dehydrogenase, involved in the oxidative stress response	AAD6	chr6	183.46	167.054	190.923	141.216	136.537	137.928		14792	15431	5530	269718	9262	254287	9262
1769972_at	0.000611731	0.0752753	1.31571	chr8:197388-198276 (-) // 100.0 //	Inositol monophosphatase, involved in biosynthesis of inositol and in phosphoinositide second messenger signaling; INM1 expression increases in the presence of inositol and decreases upon exposure to antibipolar drugs lithium and valproate	INM1	chr8	1293.79	1227.93	1409.33	1000.64	1000.13	982.282		197388	198276	5504	556105	191884	357829	191884
1779582_at	0.000307139	0.0561649	1.37859	chr7:604773-605502 (-) // 100.0 //	Protein possibly involved in a post-Golgi secretory pathway; required for the transport of nitrogen-regulated amino acid permease Gap1p from the Golgi to the cell surface	LST7	chr7	564.676	637.321	574.036	446.036	421.241	419.658		604773	605502	781	1083642	603992	478140	478140
1771262_at	0.000326457	0.056867	1.43519	chr4:375675-376476 (-) // 100.0 //	Subunit of the SF3a splicing factor complex, required for spliceosome assembly	PRP11	chr4	570.872	508.744	516.209	368.856	347.814	395.304		375675	376476	904	1524611	374771	1148135	374771
1773420_at	0.000716908	0.0752753	1.44823	chr13:559197-559869 (+) // 100.0 //	Putative protein of unknown function	---	chr13	477.427	444.311	392.583	285.613	302.493	317.338		559197	559869	6344	923539	552853	363670	363670
1772193_at	0.000196404	0.0474376	1.5186	chr12:724043-724433 (+) // 100.0 //	Putative protein of unknown function; green fluorescent protein (GFP)-fusion protein localizes to the vacuole; YLR297W is not an essential gene	---	chr12	1289.21	1149.82	1253.26	744.416	825.406	863.334		724043	724433	12085	1064279	711958	339846	339846
1772609_at	0.000708908	0.0752753	1.53312	chr11:517834-518587 (+) // 100.0 //	Putative protein of unknown function; green fluorescent protein (GFP)-fusion protein localizes to the cytoplasm and nucleus	---	chr11	134.78	138.175	119.78	77.1135	95.739	83.8481		517834	518587	808	665542	517026	146955	146955
1770133_at	0.000906009	0.0854088	1.5502	chr5:382590-385872 (-) // 100.0 //	DNA binding component of the SBF complex (Swi4p-Swi6p), a transcriptional activator that in concert with MBF (Mbp1-Swi6p) regulates late G1-specific transcription of targets including cyclins and genes required for DNA synthesis and repair	SWI4	chr5	139.409	162.393	169.276	94.2219	96.1403	113.563		382590	385872	6473	569594	376117	183722	183722
1778193_at	0.00022672	0.0503579	1.65011	chr13:501248-501890 (-) // 100.0 //	Component of the evolutionarily conserved kinetochore-associated Ndc80 complex (Ndc80p-Nuf2p-Spc24p-Spc25p); involved in chromosome segregation, spindle checkpoint activity and kinetochore clustering	SPC24	chr13	45.6917	45.0389	46.1059	30.9631	24.175	28.2118		501248	501890	6344	923539	494904	421649	421649
1778739_at	0.000685223	0.0752753	1.74686	chr15:904752-905793 (+) // 100.0 //	Nuclear protein, putative transcription factor required for growth of superficial pseudohyphae (which do not invade the agar substrate) but not for invasive pseudohyphal growth; may act together with Phd1p; potential Cdc28p substrate	SFG1	chr15	503.76	509.998	472.501	259.77	253.068	346.412		904752	905793	847	1083920	903905	178127	178127
1769322_s_at	9.72093e-07	0.00280692	8.35061	chr12:485711-485843 (-) // 100.0 // /// chr12:482059-482191 (-) // 100.0 // /// chr12:472479-472611 (-) // 100.0 // /// chr12:468827-468959 (-) // 100.0 //	Putative protein of unknown function identified by fungal homology comparisons and RT-PCR; this ORF partially overlaps RND5-2 /// Putative protein of unknown function identified by fungal homology comparisons and RT-PCR; this ORF partially overlaps RND5-3 /// Putative protein of unknown function identified by fungal homology comparisons and RT-PCR; this ORF partially overlaps RND5-4 /// Putative …	---	chr12	4199.02	3511.46	3625.42	506.244	507.117	357.578		485711	485843	12085	1064279	473626	578436	473626
1770532_at	7.85087e-09	4.53388e-05	11.4146	chr12:732541-733876 (+) // 100.0 //	Methionine and cysteine synthase (O-acetyl homoserine-O-acetyl serine sulfhydrylase), required for sulfur amino acid synthesis	MET17	chr12	3948.46	4106.2	4770.69	381.884	377.284	360.963		732541	733876	12085	1064279	720456	330403	330403
